# Supplementary material
Source: PubMed Central journal article supplement (PMC3871243)
Supplement: JCI71090sd.pdf [file JCI71090sd.pdf]

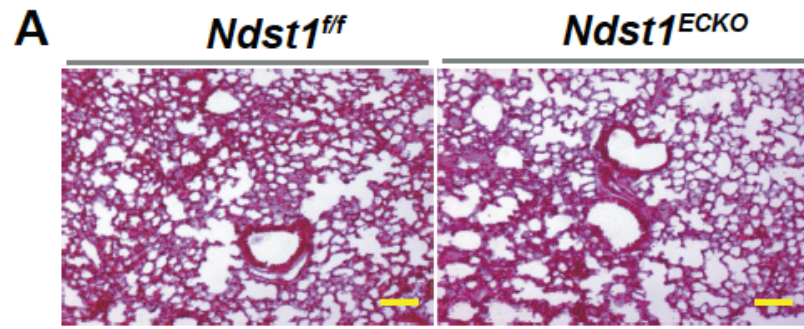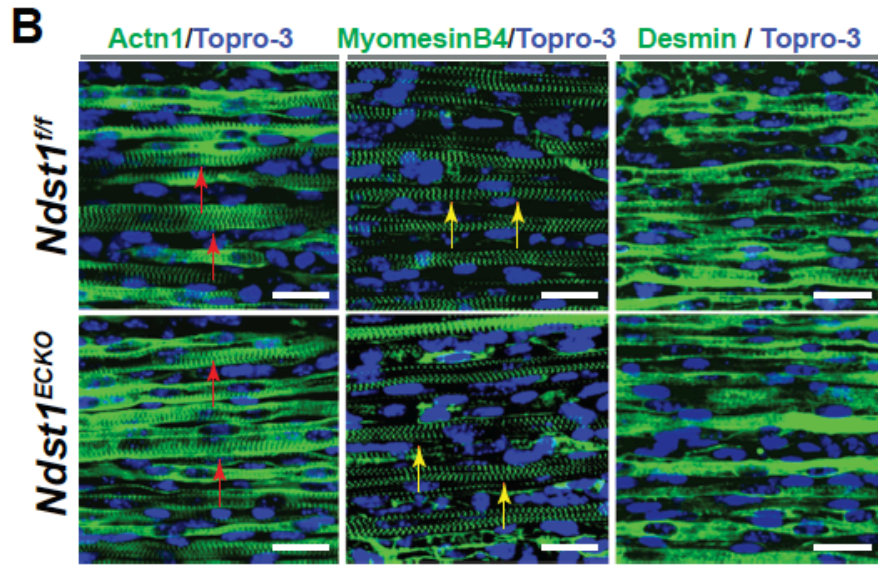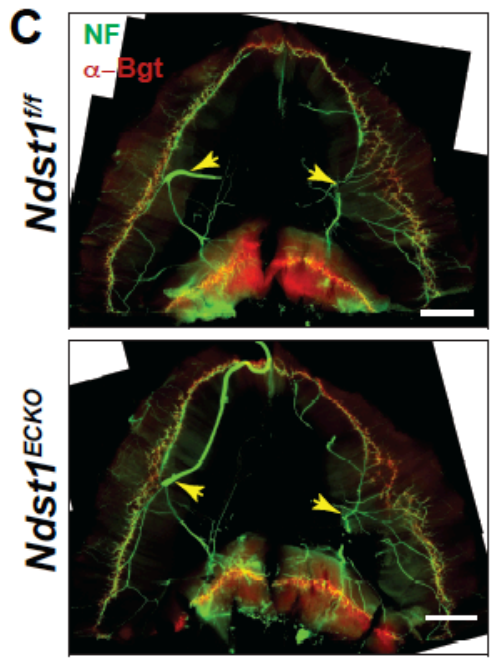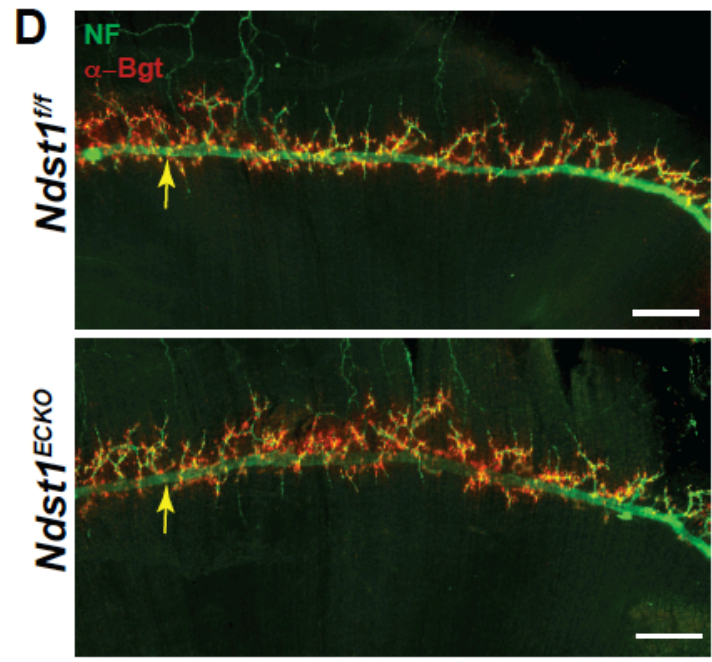

**Supplemental Figure 1.** Loss of endothelial *Ndst1* did not affect lung structure, and muscular and phrenic neural patterning in the diaphragm. **(A).** H&E staining of E18.5 lung tissue sections showed that the pulmonary architecture of *Ndst1*<sup>ECKO</sup> and *Ndst1*<sup>ff</sup> littermate controls were similar, demonstrating that *Ndst1*<sup>ECKO</sup> mice had normal lung development. **(B).** Whole-mount co-immunofluorescence staining of E15.5 diaphragmatic muscle using anti-Actinin1 (Actn1, marker of Z-band, red arrows), anti-Myomesin B4 (marker of M-band, yellow arrows) or anti-Desmin antibody. Images are representative of 3-5 mice per group. **(C,D).** Whole-mount co-immunofluorescence staining of E18.5 diaphragms with antibodies against neurofilament (NF) to label motor axons and  $\alpha$ -bungarotoxin ( $\alpha$ -Bgt) to label postsynaptic acetylcholine receptors (AChRs). Representative of 6-8 mice per group. The overall branching pattern of the phrenic nerve and the position of phrenic nerve entry points (arrow heads) are not altered in *Ndst1*<sup>ECKO</sup> mice compared to *Ndst1*<sup>ff</sup> littermate controls (C). Motor axons form a tightly fasciculated main intramuscular nerve (arrows), and individual motor axons innervate postsynaptic AChR clusters adjacent to the main nerve trunk in both *Ndst1*<sup>ECKO</sup> mice and *Ndst1*<sup>ff</sup> controls (D). Scale bars: 0.2 mm (**A; D**); 20  $\mu$ m (**B**); 1 mm (**C**).

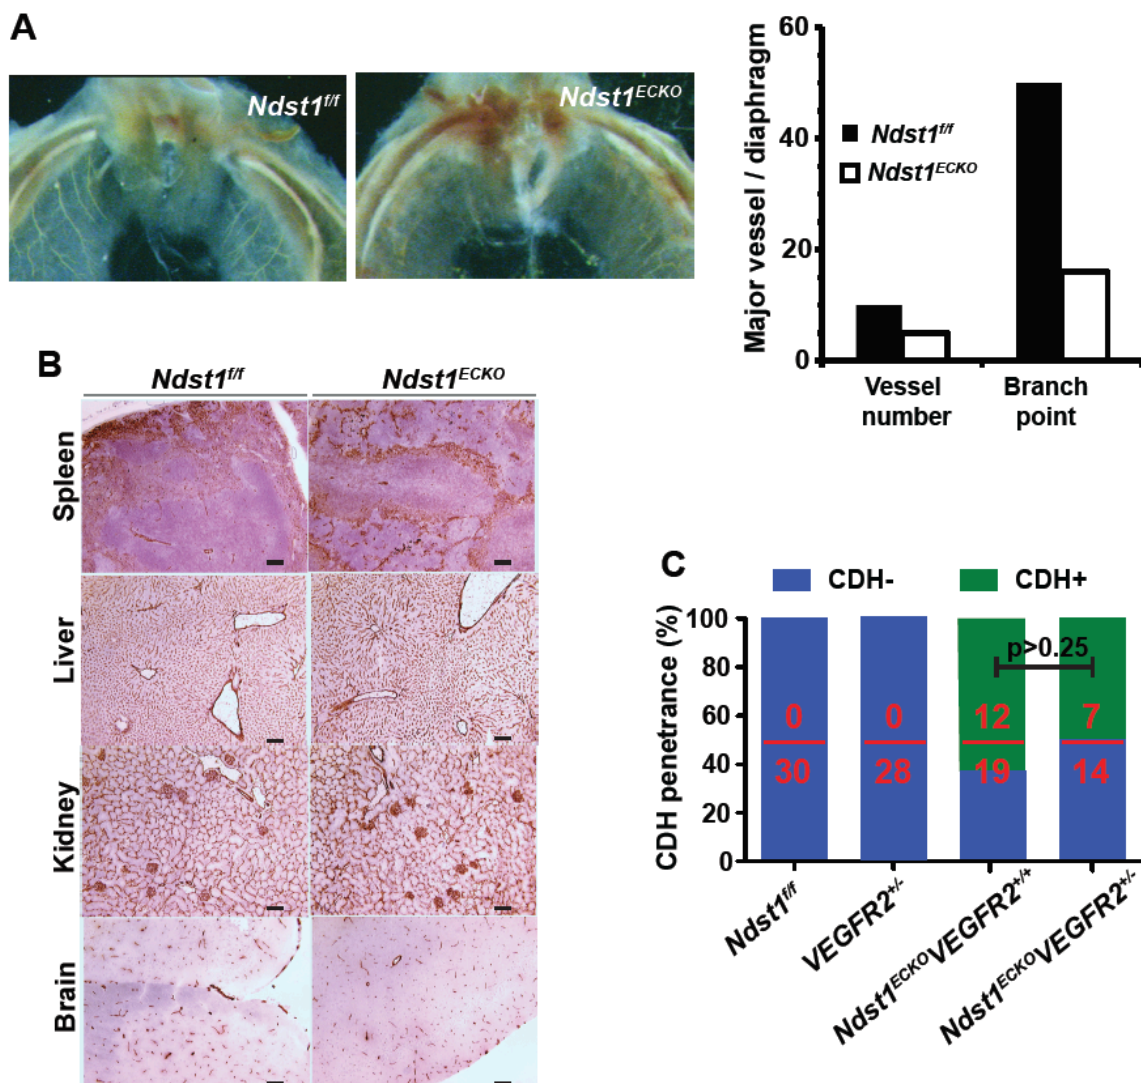

**Supplemental Figure 2.** *Ndst1<sup>ECKO</sup>* mice show abnormal vascular development only in diaphragm and no genetic interaction of endothelial *Ndst1* with *VEGFR2* in CDH aetiogenesis. **(A).** Major vessel in diaphragm. Major vessels were defined as the ones that branched from the phrenic vessel into diaphragm, and their branch points were defined as the 1st-3rd degree branches stemming from the major vessels. Quantification showed that both major vessels and their branch points were reduced in the anterior region of *Ndst1<sup>ECKO</sup>* diaphragm (n=5-6). **(B).** Tissue sections of E18.5 mouse embryos were stained with anti-PECAM-1 antibody and the general vascular structure in spleen, liver, kidney and brain were examined. No obvious differences were observed between *Ndst1<sup>ECKO</sup>* and their *Ndst1<sup>fl/fl</sup>* littermate control (n=3-4). **(C).** Genetic interaction of endothelial *Ndst1* with *VEGFR2* in CDH. CDH penetrance of control (*Ndst1<sup>fl/fl</sup>*), *VEGFR2<sup>+/-</sup>*, *Ndst1<sup>ECKO</sup>VEGFR2<sup>+/+</sup>* and *Ndst1<sup>ECKO</sup>VEGFR2<sup>+/-</sup>* mice were examined. CDH did not occur in *VEGFR2<sup>+/-</sup>* mice. The bottom numbers show the total animals examined and the numbers on the top indicate the CDH positive animals. Statistical analysis was carried out by  $\chi^2$  – test. Scale bars: 250  $\mu$ m **(B)**.

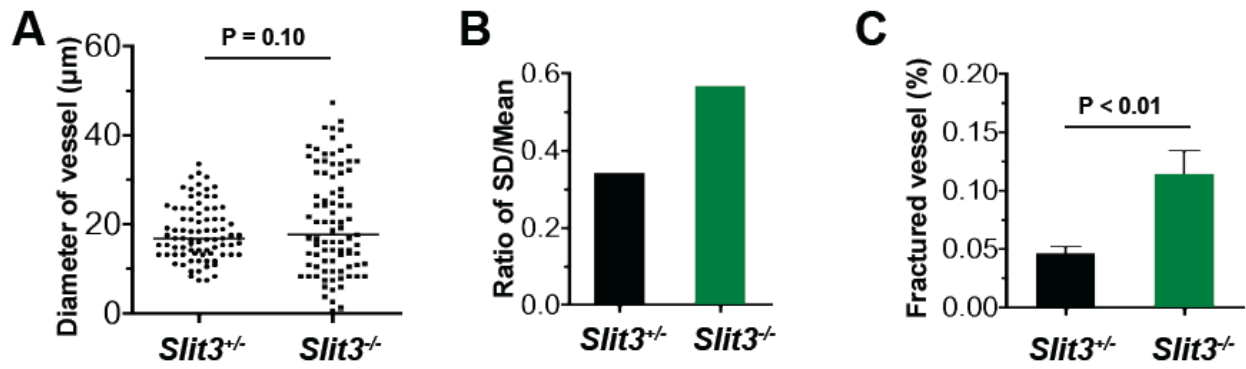

**Supplemental Figure 3.** Vascular defect in *Slit3*<sup>-/-</sup> E16.5 diaphragm, including increased variation of vessel diameter (**A**, **B**) and more fractured vessels (**C**).

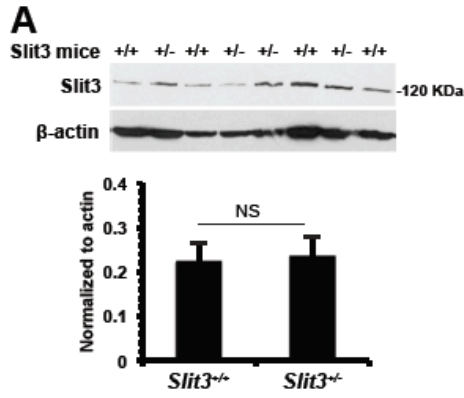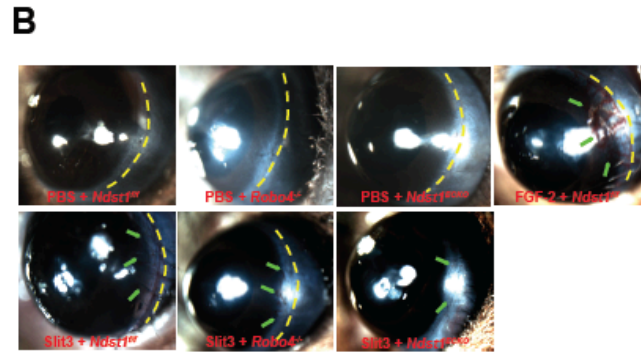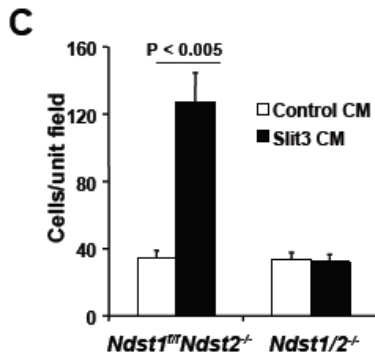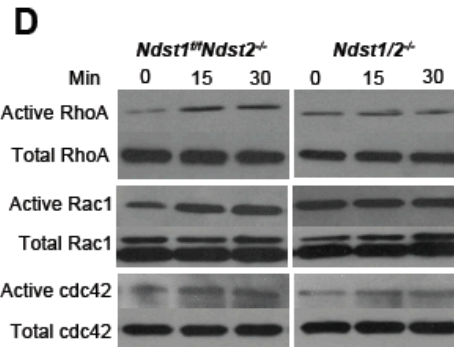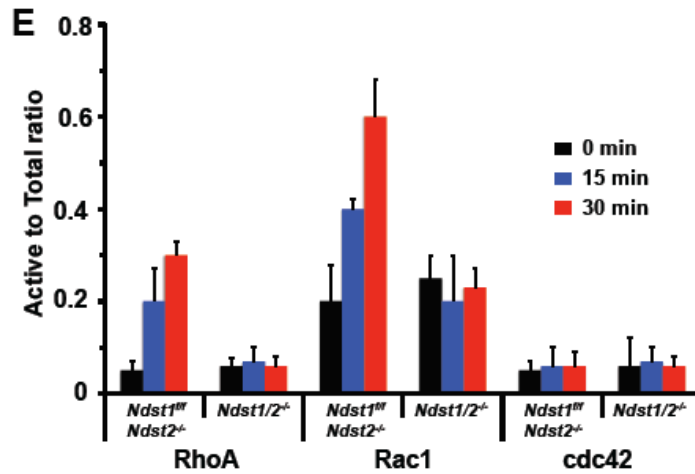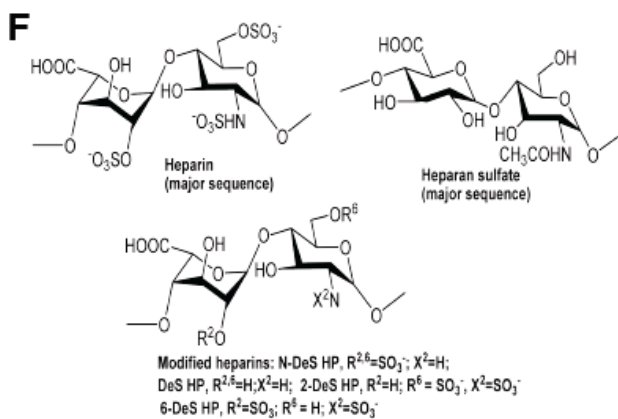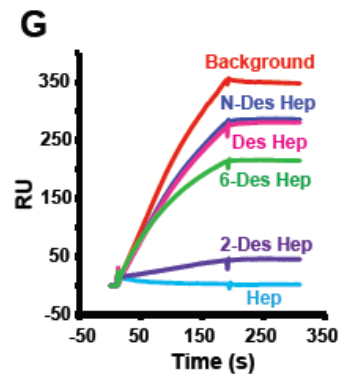



**Supplemental Figure 4.** Slit3 expression, angiogenic activity, RhoGTPases activation and Slit3 binding to heparinoids. **(A).** Slit3 expression in diaphragm. E17.5 diaphragms were collected and homogenized individually. The homogenates were analyzed by Western blot probing with anti-Slit3 antibody. Quantification showed that the Slit3 protein intensity in *Slit3*<sup>+/-</sup> and littermate *Slit3*<sup>+/+</sup> diaphragms were not different. The results are presented as average + SEM (n = 4, *P* > 0.40). NS, not significant. **(B).** Slit3-induced corneal angiogenesis was disrupted in *Robo4*<sup>-/-</sup> and *Ndst1*<sup>ECKO</sup> mice. Hydro pellets containing FGF-2 (4.8 ng) or Slit3 (1.3 ng) were implanted into micro pockets generated in mouse corneas. The pellets with balanced buffers were used as a negative control. On day 5, the corneal revascularization response to test factors was photographed and quantified. To reduce experimental variation, each mouse was implanted in one eye with the test-factor or in the other eye with control pellets. Representative pictures are shown from 5-7 mice for each group. **(C).** Slit3-induced lung EC migration depended on endothelial HS. Slit3-induced EC migration in Boyden Chambers was carried out with Slit3-containing conditioned medium (CM) or CM collected from mock-transected stable N2A cells. The *Ndst1*<sup>fl/fl</sup>*Ndst2*<sup>-/-</sup> mouse lung ECs possess normal HS structure, whereas the *Ndst1/2*<sup>-/-</sup> daughter line produces very poorly sulfated HS with dramatically reduced heparin-binding capacity. The data was summarized from three independent experiments and are presented as mean ± SD. **(D,E).** Slit3-induced Robo4 signaling depends on endothelial HS. *Ndst1*<sup>fl/fl</sup>*Ndst2*<sup>-/-</sup> and *Ndst1/2*<sup>-/-</sup> mouse lung ECs were stimulated with Slit3, and the downstream signaling of Robo4 (RhoA, Rac1 and Cdc42) was examined. Activation of Rac1 and RhoA in *Ndst1/2*<sup>-/-</sup> ECs was significantly reduced compared to *Ndst1*<sup>fl/fl</sup>*Ndst2*<sup>-/-</sup> ECs. **(F).** Chemical structure of major sequences of heparin, HS and modified-heparins. **(G).** Loss of *N*-sulfation abolished binding of heparin to Slit3. The Slit3 protein (10 nM) was premixed with 1000 nM heparin (Hep), fully-desulfated-heparin (Des-Hep), *N*-desulfated-heparin (N-Des-Hep), 6-*O*-desulfated-heparin (6-Des-Hep) or 2-*O*-desulfated-heparin (2-Des-Hep) and then the mixture was injected over heparin coated CM5 chips. Des-Hep and N-Des-Hep, and to a lesser extent 6-Des-Hep, lost their potency to inhibit Slit3 binding to immobilized heparin. The SPR sensorgram shown is representative of three experiments.

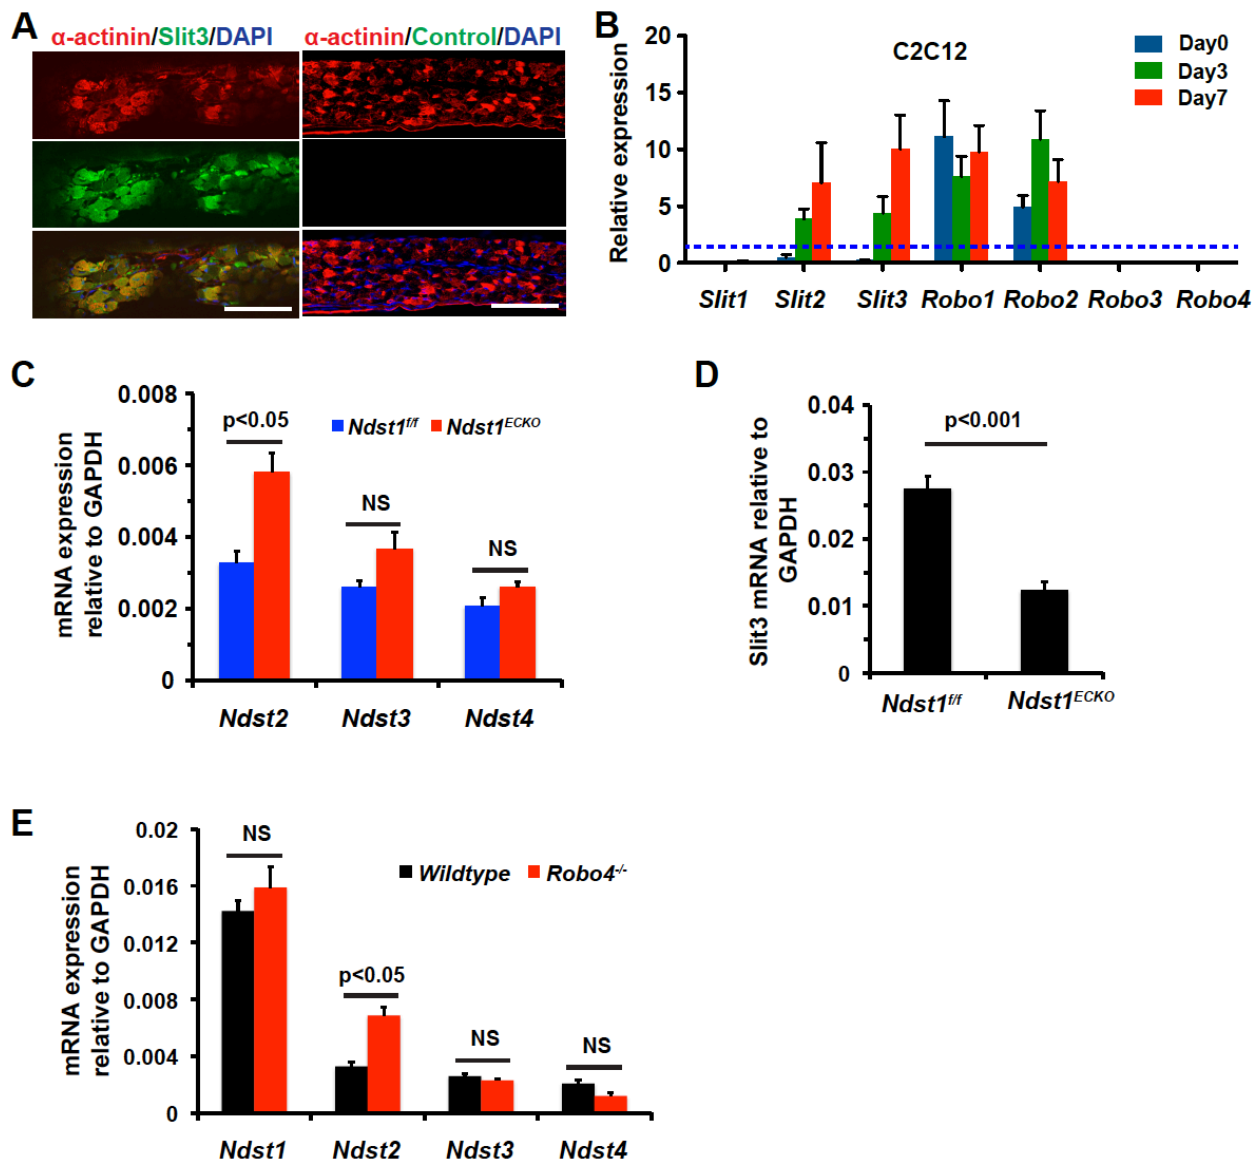

**Supplemental Figure 5.** Slit3 binding to diaphragm muscle cells, and Slit/Robo expression in myoblast and diaphragmatic ECs. **(A).** Slit3 binds to diaphragmatic muscle cell. Biotinylated-Slit3 were diluted with 10 fold of PBS and incubated with P0 embryo cryosection for 1 hour at room temperature, followed by fixation in 4% PFA for 20 min. The diaphragmatic muscle fibers were revealed by anti- $\alpha$ -actinin antibody. **(B).** *Slit2-3* and *Robo1-2* express in C2C12 differentiated myofibers. Undifferentiated (Day 0) and differentiated C2C12 (Day 3 and 7) were collected for RT-qPCR analysis. The expression levels of *Slits* and *Robos* are presented relatively to Ct35 (blue line). **(C-E).** Expression of *Ndsts* and *Slit3* in passage 0 primary diaphragmatic ECs. NS, not significant. Scale bars: 40  $\mu$ m **(A)**.

**Table 1. Primer sequences**

| <b>Gene</b> | <b>Forward</b>             | <b>Reverse</b>               |
|-------------|----------------------------|------------------------------|
| Slit1       | 5`-aggtgcaaaagggcgaat-3`   | 5`-cgagaggggtacaggcaggt-3`   |
| Slit2       | 5`-tcgagccagctatgacacc-3`  | 5`-ttccatcattgattgtctccac-3` |
| Slit3       | 5`-gccacctcagtgagaacctc-3` | 5`-tgtccctcaaagcccaga-3`     |
| Robo1       | 5`-agggaaagcctacgcagatg-3` | 5`-tggacagtgggcgattttat-3`   |
| Robo2       | 5`-gaaatthggcggtggaga-3`   | 5`-gtcgtgtttatccccttg-3`     |
| Robo3       | 5`-gcagcgctcaaccctagt-3`   | 5`-cttctggccaactcttgac-3`    |
| Robo4       | 5`-aatggtgcatccgtggttac-3` | 5`-agttggcagcaggcaatg-3`     |
| Ndst1       | 5`-ggaatccagtcgctcaaat-3`  | 5`-gtctgtgagtgtggcatgt-3`    |
| Ndst2       | 5`-gggattcctacggatctgg-3`  | 5`-tagagctgcgagtggatgg-3`    |
| Ndst3       | 5`-ggtgtttgtggagagccagt-3` | 5`-gaaccggatggattctagca-3`   |
| Ndst4       | 5`-tcaggtcaccagcactgaag-3` | 5`-gaatgaagccctcctgtacc-3`   |
| GAPDH       | 5`-aactttggcattgtggaagg-3` | 5`-atgcagggatgatgttctgg-3`   |
